# Supplementary material
Source: MDPI journal article supplement (https://www.mdpi.com/2072-4292/13/13/2505)
Supplement: s1 [file s1 › supplementary_material_robson_et_al_2021.pdf]

# Seasonal surface subsidence and frost heave detected by C-band DInSAR in a High Arctic environment, Cape Bounty, Melville Island, Nunavut, Canada

Greg Robson <sup>1, \*</sup>, Paul M. Treitz <sup>1</sup>, Scott F. Lamoureux <sup>1</sup>, Kevin Murnaghan <sup>2</sup>, Brian Brisco <sup>2</sup>

<sup>1</sup> Department of Geography and Planning, Queen's University, Mackintosh-Corry Hall, Kingston, Ontario, K7L 3N6, Canada; g.robson@queensu.ca (GR); paul.treitz@queensu.ca (PMT); scott.lamoureux@queensu.ca (SFL)

<sup>2</sup> Canada Centre for Remote Sensing, 560 Rochester Street, Ottawa, Ontario, K1A 0E4, Canada; kevin.murnaghan@canada.ca (KM); brian.brisco@canada.ca (BB)

\* Correspondence: g.robson@queensu.ca

## Supplementary material

**Table S1: Kauth-Thomas transform coefficients to derive the wetness index from WorldView-2 imagery (from Yarbrough et al., 2014)**

| Band           | Coastal  | Blue     | Green    | Yellow   | Red      | Red Edge | NIR1     | NIR2     |
|----------------|----------|----------|----------|----------|----------|----------|----------|----------|
| $\lambda$ (nm) | 400-450  | 450-510  | 510-580  | 585-625  | 630-690  | 705-745  | 770-895  | 860-1040 |
| Coefficients   | -0.27095 | -0.31571 | -0.31726 | -0.24254 | -0.25646 | -0.09655 | -0.74253 | 0.20243  |

**Table S2: Estimation of DInSAR error: average (absolute) displacement measured by DInSAR within six control polygons within 'stable' areas of bedrock of felsenmeer (similar control locations as in Rudy et al. 2018). Coordinates are in WGS84, UTM Zone 12X**

| Centre of polygon |         |          |               | Average (absolute) measured vertical displacement (cm) |                      |                     |
|-------------------|---------|----------|---------------|--------------------------------------------------------|----------------------|---------------------|
| ID                | Easting | Northing | No. of pixels | 2013 Jul 16-Sep2                                       | 2015 Jul 30 – Sep 16 | 2019 Aug 2 – Sep 19 |
| 0                 | 540514  | 8309176  | 219           | 0.77                                                   | 0.31                 | 0.81                |
| 1                 | 540030  | 8311642  | 43            | 0.40                                                   | 0.39                 | 1.38                |
| 2                 | 541784  | 8311574  | 45            | 0.87                                                   | 0.88                 | 0.77                |
| 3                 | 542076  | 8313029  | 5             | 0.38                                                   | 1.39                 | 0.97                |
| 4                 | 541087  | 8313677  | 27            | 0.11                                                   | 0.23                 | 1.40                |
| 5                 | 544581  | 8314756  | 113           | 0.11                                                   | 0.10                 | 0.55                |
| Mean              |         |          |               | 0.44                                                   | 0.55                 | 0.98                |

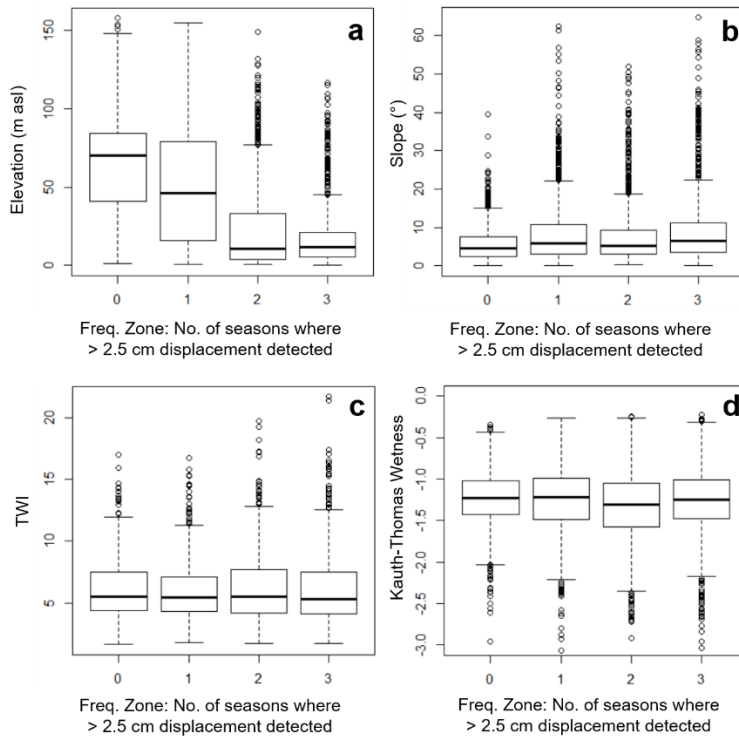

**Figure S1: Statistical summary of (a) elevation; (b) slope; (c) topographic wetness index; (d) Kauth-Thomas wetness of pixels randomly sampled from within areas which displayed >2.5 cm in one, many, or none of the studied years**

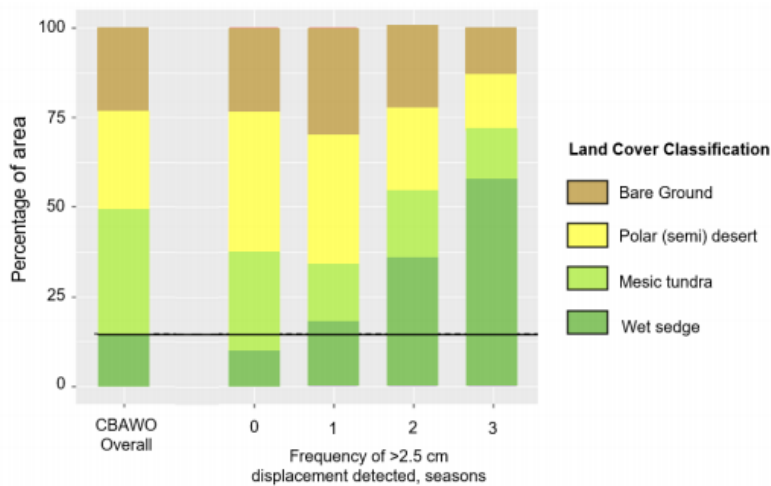

**Figure S2: Land cover make up of each frequency zone as compared to the composition of the CBAWO as a whole. As an example, despite making up only 14 % of total area at the CBAWO, 57 % of the areas which displayed >2.5 cm displacement in all three seasons were found within areas of wet sedge**
